# Supplementary material
Source: Springer Nature journal article supplement (https://www.springermedizin.de/resource/supplementary/12889_2010_2187_MOESM2_ESM.pdf/9484900)
Supplement: MOESM2 [file 9484900]

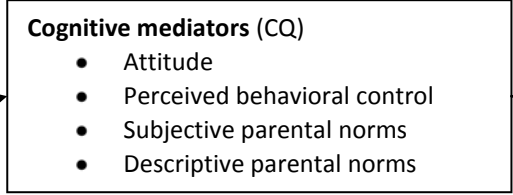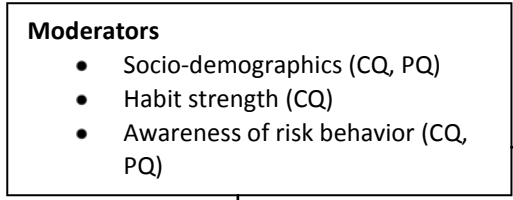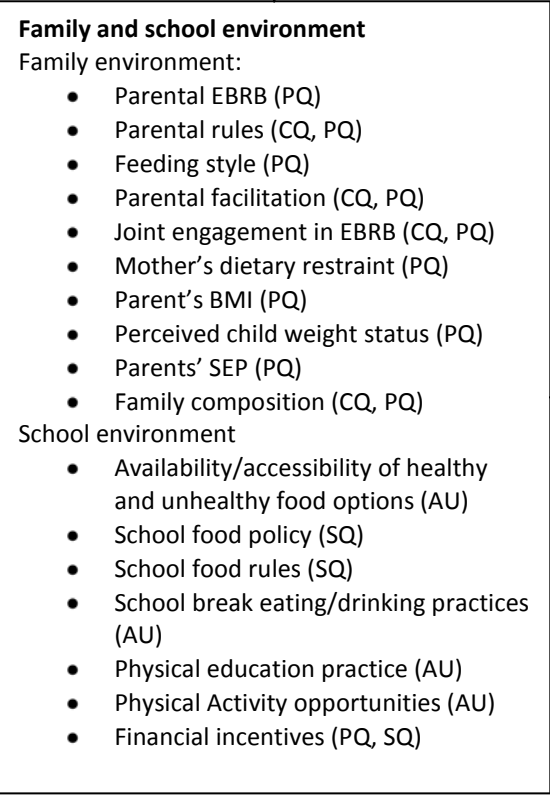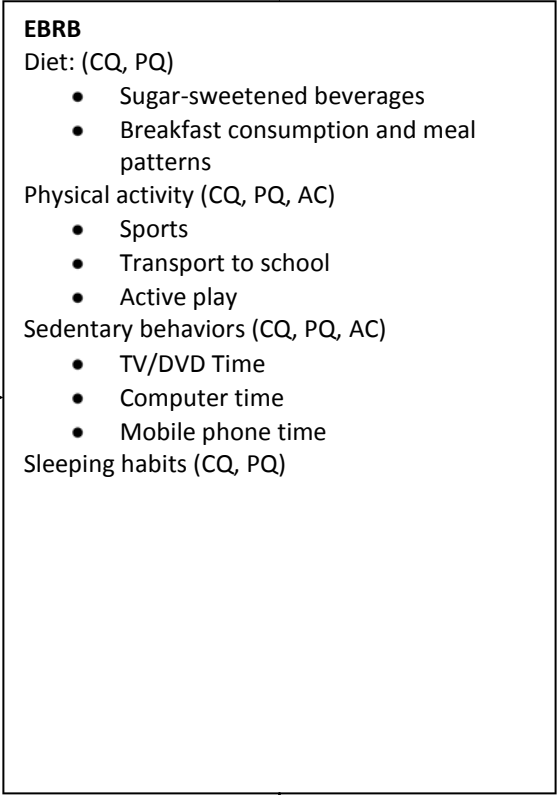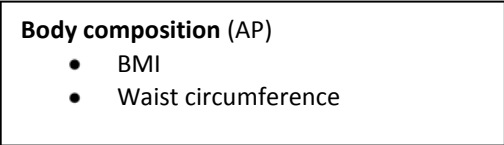

**Abbreviations (alphabetical order):**

- AC = Accelerometer
- AP = anthropometrics
- AU = school environment audit
- BMI = Body Mass Index
- CQ = Child questionnaire
- EBRB = Energy balance-related behavior
- PA = Physical activity
- PQ = Parent questionnaire
- SEP = Socio-economic position
- SQ = school staff questionnaire
